# Supplementary material
Source: PubMed Central journal article supplement (PMC10908374)
Supplement: NIHMS1966246-supplement-Supplementary_Info.pdf [file NIHMS1966246-supplement-Supplementary_Info.pdf]

# Phosphoinositide acyl chain saturation drives CD8<sup>+</sup> effector T cell signaling and function

---

In the format provided by the authors and unedited

---

**Supplementary Table 1. Demographic and disease characteristics of patients with malignant melanoma**

|                                              |               |
|----------------------------------------------|---------------|
| <b>Demographics</b>                          |               |
| No. participants (%)                         | 13 (100)      |
| Median age (range), years                    | 55 (46-90)    |
| Sex                                          |               |
| female - no. (%)                             | 4 (31)        |
| male - no. (%)                               | 9 (69)        |
| <b>Disease and treatment characteristics</b> |               |
| Site of primary manifestation                |               |
| Skin - no. (%)                               | 12 (92)       |
| Uvea - no. (%)                               | 1 (8)         |
| Tumor stage                                  |               |
| Stage III - no. (%)                          | 1 (8)         |
| Stage IV - no. (%)                           | 12 (92)       |
| Lesion sites                                 |               |
| 1 - no. (%)                                  | 4 (31)        |
| 2 - no. (%)                                  | 5 (38)        |
| 3 - no. (%)                                  | 4 (31)        |
| Treatment type                               |               |
| Pembrolizumab - no. (%)                      | 4 (31)        |
| Nivolumab - no. (%)                          | 1 (8)         |
| Nivolumab/Ipilimumab - no. (%)               | 8 (61)        |
| Response                                     |               |
| Complete remission - no. (%)                 | 1 (8)         |
| Partial remission - no. (%)                  | 5 (38)        |
| Stable disease - no. (%)                     | 1 (8)         |
| Progressive disease - no. (%)                | 5 (38)        |
| Not available - no. (%)                      | 1 (8)         |
| Immune-related adverse events                |               |
| No - no. (%)                                 | 4 (31)        |
| Yes - no. (%)                                | 9 (69)        |
| Median follow up duration (days)             | 318 (184-484) |

**Supplementary Table 2. Nucleotide sequences of gRNA for CRISPR-Cas9-mediated gene deletion**

| <b>Gene</b>    | <b>Sequences</b>                                                                              |
|----------------|-----------------------------------------------------------------------------------------------|
| <i>Cd1pt</i>   | Mm.Cas9.GGACTCCTAGACGCTTTCTGA<br>Mm.Cas9.TCGGATCTACTATACCTCTA<br>Mm.Cas9.CAGCACTCACCGATAAGGTT |
| <i>Zap70</i>   | Mm.Cas9.CCATCGAGCGCCAATCAA<br>Mm.Cas9.GCACCAAGTTTGACACGCTC                                    |
| <i>Control</i> | Mm.Cas9.GCGAGGTATTCGGCTCCGCG                                                                  |
